# Supplementary material for: Immunological and clinical immunotherapy implications of NLRP3 mutations in melanoma
Source: PubMed Central journal article supplement (PMC8610131; doi:10.18632/aging.203678), 2021-11-08
Supplement: aging-13-203678-s001.pdf [file aging-13-203678-s001.pdf]

SUPPLEMENTARY FIGURES

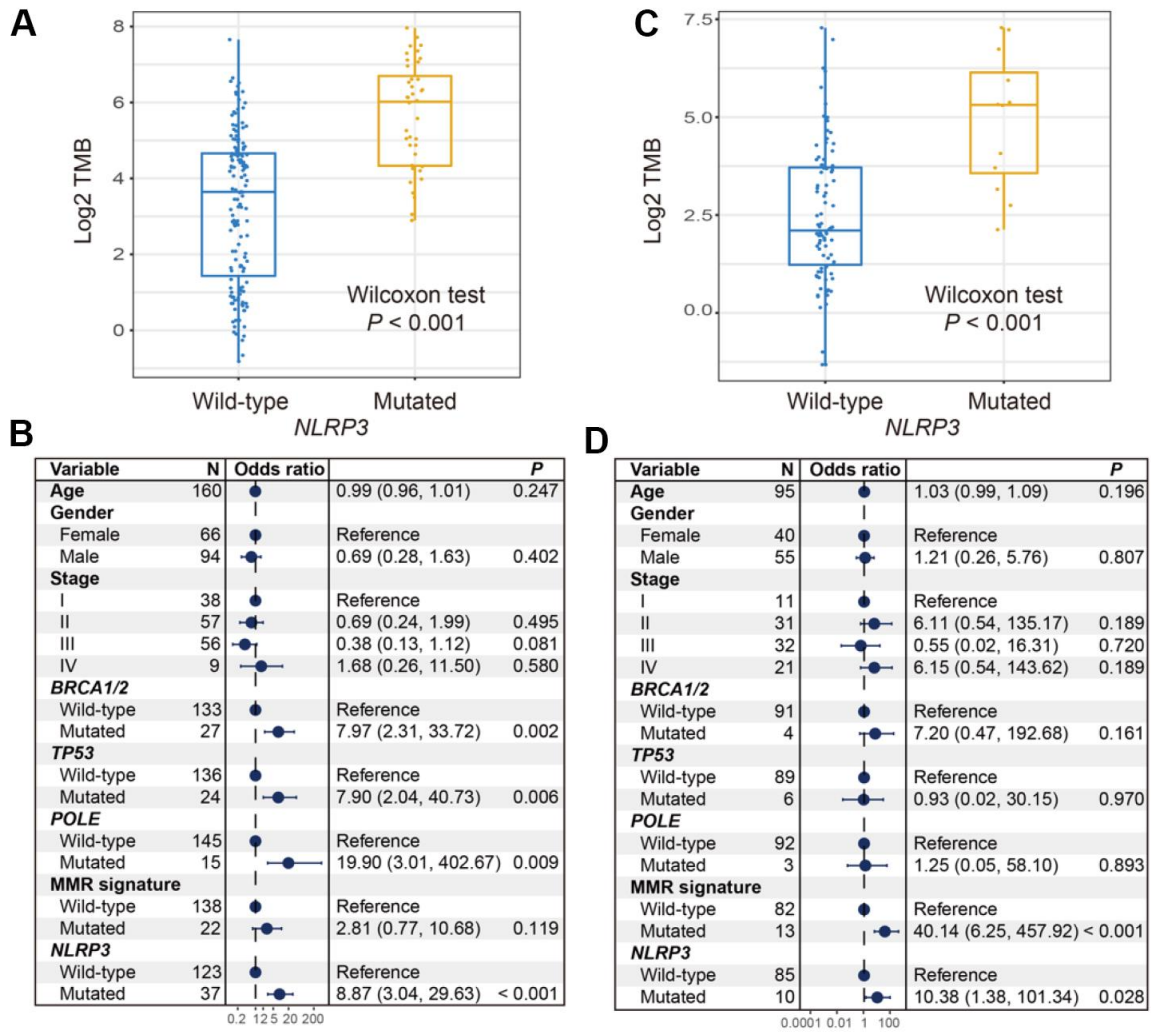

Supplementary Figure 1. Association of *NLRP3* mutations with TMB in 2 ICGC melanoma cohorts. *NLRP3* mutations versus TMB with (A) univariate analysis and (B) multivariate regression model in MELA-AU cohort; *NLRP3* mutations versus TMB with (C) univariate analysis and (D) multivariate regression model in SKCA-BR cohort.

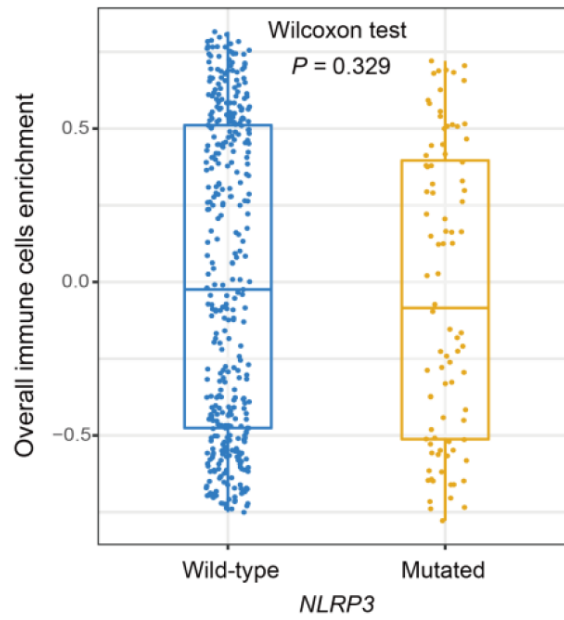

Supplementary Figure 2. Infiltration of overall immune cells in patients with and without *NLRP3* mutations.

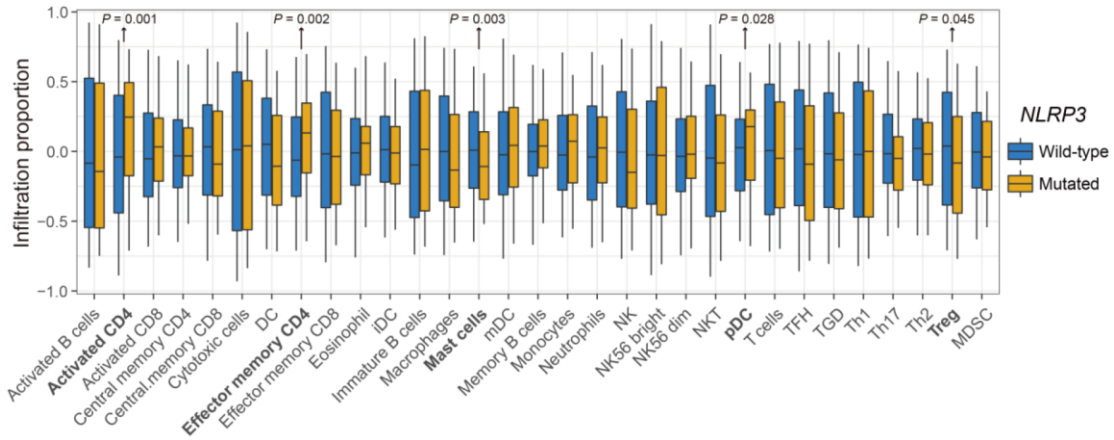

Supplementary Figure 3. Infiltration of 31 immune cells stratified by *NLRP3* mutation status according to Angelova et al. method.

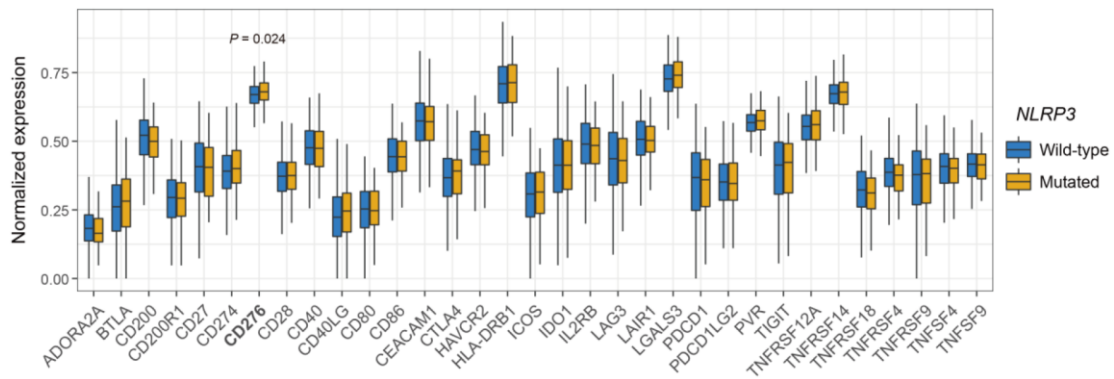

Supplementary Figure 4. Expression of 33 immune checkpoint genes stratified by *NLRP3* mutation status.

| Mutated <i>NLRP3</i> pathways          | Gene ranks | NES  | <i>P</i> | FDR     |
|----------------------------------------|------------|------|----------|---------|
| ARACHIDONIC_ACID_METABOLISM            |            | 2.65 | 7.4e-04  | 5.7e-03 |
| HEDGEHOG_SIGNALING_PATHWAY             |            | 1.86 | 7.3e-04  | 5.7e-03 |
| BASAL_CELL_CARCINOMA                   |            | 1.95 | 7.1e-04  | 5.7e-03 |
| COMPLEMENT_AND_COAGULATION_CASCADES    |            | 2.36 | 8.7e-04  | 6.4e-03 |
| LINOLEIC_ACID_METABOLISM               |            | 2.07 | 9.9e-04  | 7.0e-03 |
| GRAFT_VERSUS_HOST_DISEASE              |            | 2.02 | 1.1e-03  | 7.1e-03 |
| ECM_RECEPTOR_INTERACTION               |            | 2.11 | 1.0e-03  | 7.1e-03 |
| CELL_ADHESION_MOLECULES_CAMS           |            | 1.63 | 1.7e-03  | 9.2e-03 |
| ALLOGRAFT_REJECTION                    |            | 1.74 | 5.4e-03  | 2.4e-02 |
| CYTOKINE_CYTOKINE_RECEPTOR_INTERACTION |            | 2.08 | 5.7e-03  | 2.5e-02 |

Supplementary Figure 5. GSEA analysis of *NLRP3* mutant patients.

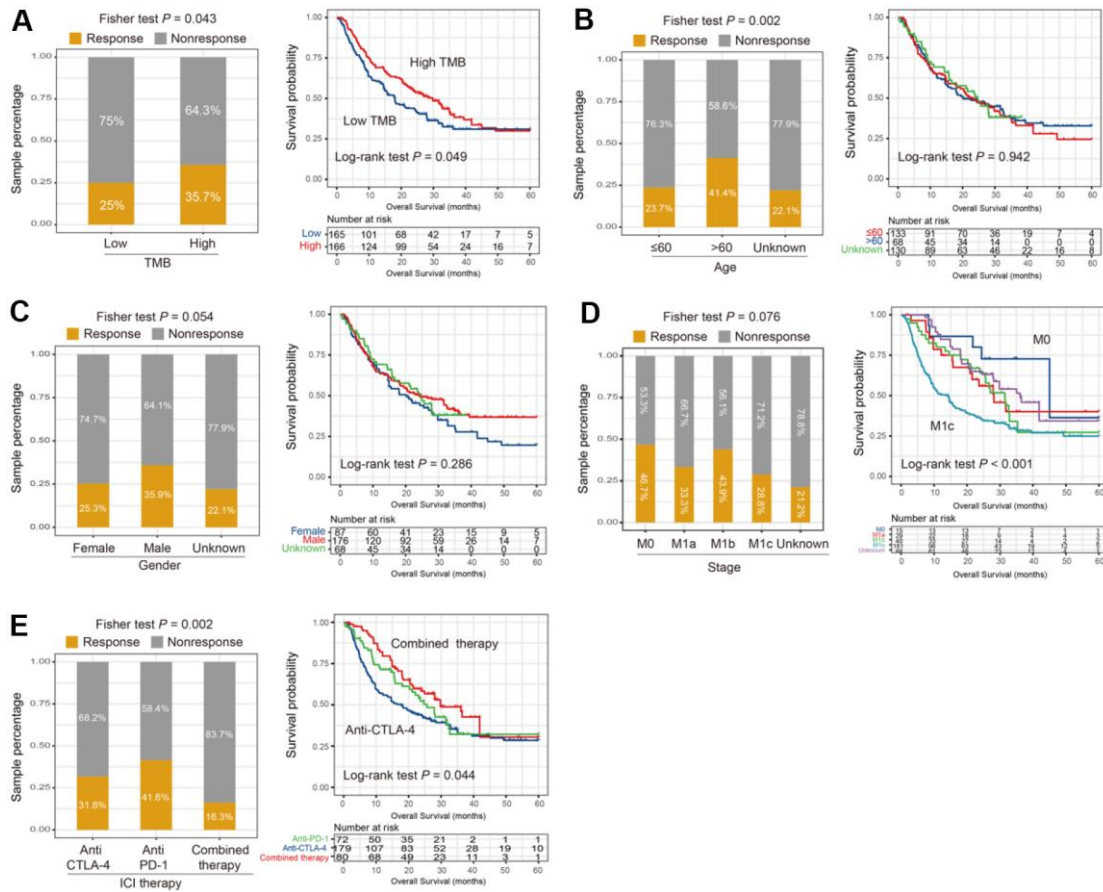

**Supplementary Figure 6. Clinical characteristics association with ICI efficacy.** Association of (A) TMB, (B) age, (C) gender, (D) stage, and (E) treatment type with ICI response rate and prognosis.

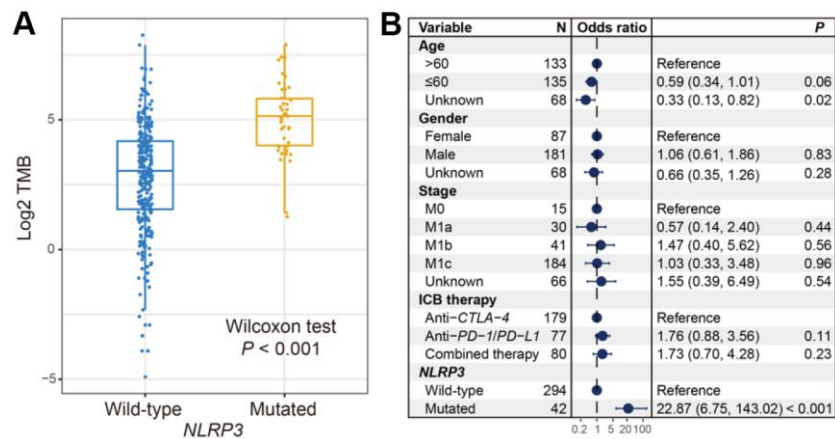

**Supplementary Figure 7. Correlation of *NLRP3* mutations with TMB in the pooled ICI-treated cohort.** (A) Wilcoxon rank-sum test and (B) multivariate Logistic regression analysis for the correlation of *NLRP3* mutations with TMB.

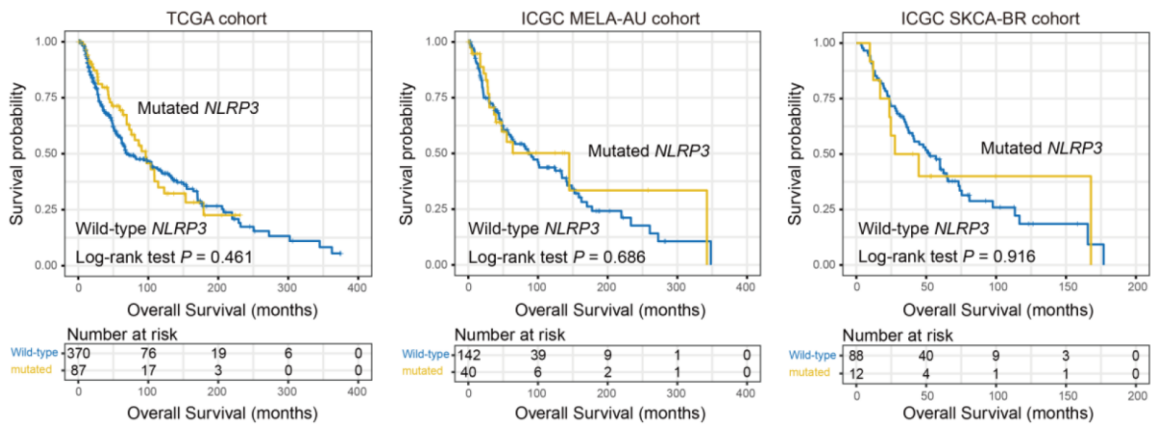

Supplementary Figure 8. Kaplan-Meier survival analysis of *NLRP3* mutations in 3 non-ICI-treated cohorts.

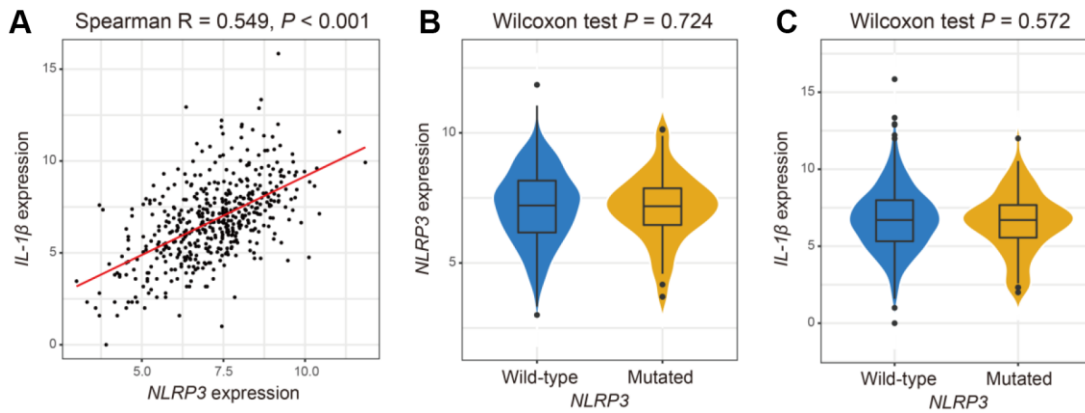

Supplementary Figure 9. *NLRP3* and *IL-1 $\beta$*  mRNA expression concerning *NLRP3* mutational status in melanoma based on the data from TCGA cohort. (A) Correlation analysis between *NLRP3* and *IL-1 $\beta$*  expression. Distinct expression of (B) *NLRP3* and (C) *IL-1 $\beta$*  in *NLRP3* wild-type versus mutated subgroups.
