# Supplementary material for: Immunological and clinical immunotherapy implications of NLRP3 mutations in melanoma
Source: PubMed Central journal article supplement (PMC8610131; doi:10.18632/aging.203678), 2021-11-08
Supplement: aging-13-203678-s002.pdf [file aging-13-203678-s002.pdf]

**SUPPLEMENTARY TABLE**

**Supplementary Table 1. Association of *NLRP3* mutations with clinical characteristics in 336 ICI-treated melanoma patients.**

| Characteristics  | n (%) (N = 366) | <i>NLRP3</i>        |                  | <i>P</i> |
|------------------|-----------------|---------------------|------------------|----------|
|                  |                 | Wild-type (n = 294) | Mutated (n = 42) |          |
| Age, years       |                 |                     |                  |          |
| ≤60              | 135 (40.2%)     | 122 (41.5%)         | 13 (30.9%)       | 0.112    |
| >60              | 133 (39.6%)     | 110 (37.4%)         | 23 (54.8%)       |          |
| Unknown          | 68 (20.2%)      | 62 (21.1%)          | 6 (14.3%)        |          |
| Gender           |                 |                     |                  |          |
| Male             | 181 (53.9%)     | 152 (51.7%)         | 29 (69.0%)       | 0.119    |
| Female           | 87 (25.9%)      | 80 (27.2%)          | 7 (16.7%)        |          |
| Unknown          | 68 (20.2%)      | 62 (21.1%)          | 6 (14.3%)        |          |
| Stage            |                 |                     |                  |          |
| M0               | 15 (4.5%)       | 13 (4.4%)           | 2 (4.8%)         | 0.343    |
| M1a              | 30 (8.9%)       | 29 (9.9%)           | 1 (2.4%)         |          |
| M1b              | 41 (12.2%)      | 36 (12.2%)          | 5 (11.8%)        |          |
| M1c              | 184 (54.8%)     | 162 (55.1%)         | 22 (52.4%)       |          |
| Unknown          | 66 (19.6%)      | 54 (18.4%)          | 12 (28.6%)       |          |
| ICB treatment    |                 |                     |                  |          |
| Anti-CTLA-4      | 179 (53.3%)     | 158 (53.7%)         | 21 (50.0%)       | 0.882    |
| Anti-PD-1        | 77 (22.9%)      | 67 (22.8%)          | 10 (23.8%)       |          |
| Combined therapy | 80 (23.8%)      | 69 (23.5%)          | 11 (26.2%)       |          |
| RECIST           |                 |                     |                  |          |
| CR/PR            | 102 (30.4%)     | 83 (28.2%)          | 19 (45.2%)       | 0.229    |
| SD               | 43 (12.8%)      | 39 (13.3%)          | 4 (9.5%)         |          |
| PD               | 191 (56.8%)     | 172 (58.5%)         | 19 (45.3%)       |          |
| OS status        |                 |                     |                  |          |
| Alive            | 132 (39.3%)     | 108 (36.7%)         | 24 (57.1%)       | 0.002    |
| Dead             | 200 (59.5%)     | 184 (62.6%)         | 16 (38.1%)       |          |
| Unknown          | 4 (1.2%)        | 2 (0.7%)            | 2 (4.8%)         |          |
| TMB              |                 |                     |                  |          |
| Low              | 168 (50.0%)     | 166 (56.5%)         | 2 (4.8%)         | < 0.001  |
| High             | 168 (50.0%)     | 128 (43.5)          | 40 (95.2%)       |          |
