# Supplementary material for: Immunological and clinical immunotherapy implications of NLRP3 mutations in melanoma
Source: Aging (Albany NY). 2021 Nov 8;13(21):24271–89. doi: 10.18632/aging.203678 (PMC8610131; doi:10.18632/aging.203678)
Supplement: Supplementary Table 2 [file aging-13-203678-s003.xlsx]

## Sheet: Table S2
Supplementary Table 2. Clinical characteristics of included 336 ICI-treated melanoma patients.
Patinet_ID	Patient	DOI	Overall_survival (months)	Vital_status	Age	Sex	M_Stage	Response_status	Therapy_target	Therapy_drug	Sequencing_platform
1	Pt1	10.1016/j.cell.2016.02.065	20.2333	Deceased	66	Female	M1b	PD	PD-1	Pembrolizumab/Nivolumab	HiSeq 2000(Illumina)
2	Pt10	10.1016/j.cell.2016.02.065	12.9	Alive	60	Male	M1a	PD	PD-1	Pembrolizumab/Nivolumab	HiSeq 2000(Illumina)
3	Pt11	10.1016/j.cell.2016.02.065	15.5667	Deceased	37	Male	M1c	PD	PD-1	Pembrolizumab/Nivolumab	HiSeq 2000(Illumina)
4	Pt12	10.1016/j.cell.2016.02.065	10.9	Deceased	59	Male	M1c	PD	PD-1	Pembrolizumab/Nivolumab	HiSeq 2000(Illumina)
5	Pt13	10.1016/j.cell.2016.02.065	30.5667	Alive	53	Female	M1c	CR/PR	PD-1	Pembrolizumab/Nivolumab	HiSeq 2000(Illumina)
6	Pt14	10.1016/j.cell.2016.02.065	1.8	Alive	27	Female	M1c	PD	PD-1	Pembrolizumab/Nivolumab	HiSeq 2000(Illumina)
7	Pt15	10.1016/j.cell.2016.02.065	32.6667	Deceased	70	Male	M1b	CR/PR	PD-1	Pembrolizumab/Nivolumab	HiSeq 2000(Illumina)
8	Pt16	10.1016/j.cell.2016.02.065	6.2	Deceased	19	Male	M1b	PD	PD-1	Pembrolizumab/Nivolumab	HiSeq 2000(Illumina)
9	Pt17	10.1016/j.cell.2016.02.065	31.7667	Deceased	67	Male	M1a	PD	PD-1	Pembrolizumab/Nivolumab	HiSeq 2000(Illumina)
10	Pt18	10.1016/j.cell.2016.02.065	36.0333	Alive	64	Male	M1c	CR/PR	PD-1	Pembrolizumab/Nivolumab	HiSeq 2000(Illumina)
11	Pt19	10.1016/j.cell.2016.02.065	35.3333	Alive	45	Male	M1c	CR/PR	PD-1	Pembrolizumab/Nivolumab	HiSeq 2000(Illumina)
12	Pt2	10.1016/j.cell.2016.02.065	30.9	Alive	55	Male	M1c	CR/PR	PD-1	Pembrolizumab/Nivolumab	HiSeq 2000(Illumina)
13	Pt20	10.1016/j.cell.2016.02.065	11.2333	Deceased	63	Female	M1c	PD	PD-1	Pembrolizumab/Nivolumab	HiSeq 2000(Illumina)
14	Pt21	10.1016/j.cell.2016.02.065	31.5	Deceased	60	Male	M1b	CR/PR	PD-1	Pembrolizumab/Nivolumab	HiSeq 2000(Illumina)
15	Pt22	10.1016/j.cell.2016.02.065	6.06667	Deceased	55	Male	M1c	PD	PD-1	Pembrolizumab/Nivolumab	HiSeq 2000(Illumina)
16	Pt23	10.1016/j.cell.2016.02.065	3.43333	Deceased	63	Male	M1c	PD	PD-1	Pembrolizumab/Nivolumab	HiSeq 2000(Illumina)
17	Pt24	10.1016/j.cell.2016.02.065	32.4667	Deceased	70	Male	M1c	CR/PR	PD-1	Pembrolizumab/Nivolumab	HiSeq 2000(Illumina)
18	Pt25	10.1016/j.cell.2016.02.065	8.73333	Deceased	74	Male	M1c	PD	PD-1	Pembrolizumab/Nivolumab	HiSeq 2000(Illumina)
19	Pt26	10.1016/j.cell.2016.02.065	44.5333	Alive	71	Male	M1c	CR/PR	PD-1	Pembrolizumab/Nivolumab	HiSeq 2000(Illumina)
20	Pt27	10.1016/j.cell.2016.02.065	18.2667	Alive	83	Male	M1c	CR/PR	PD-1	Pembrolizumab/Nivolumab	HiSeq 2000(Illumina)
21	Pt28	10.1016/j.cell.2016.02.065	14.6333	Deceased	82	Male	M1c	CR/PR	PD-1	Pembrolizumab/Nivolumab	HiSeq 2000(Illumina)
22	Pt29	10.1016/j.cell.2016.02.065	8.96667	Deceased	84	Male	M1c	PD	PD-1	Pembrolizumab/Nivolumab	HiSeq 2000(Illumina)
23	Pt3	10.1016/j.cell.2016.02.065	23.0333	Deceased	58	Male	M1c	CR/PR	PD-1	Pembrolizumab/Nivolumab	HiSeq 2000(Illumina)
24	Pt30	10.1016/j.cell.2016.02.065	3.33333	Deceased	80	Female	M1c	PD	PD-1	Pembrolizumab/Nivolumab	HiSeq 2000(Illumina)
25	Pt31	10.1016/j.cell.2016.02.065	23.4667	Alive	47	Male	M1c	PD	PD-1	Pembrolizumab/Nivolumab	HiSeq 2000(Illumina)
26	Pt32	10.1016/j.cell.2016.02.065	5.7	Deceased	47	Male	M1c	PD	PD-1	Pembrolizumab/Nivolumab	HiSeq 2000(Illumina)
27	Pt33	10.1016/j.cell.2016.02.065	72.5667	Alive	80	Female	M1a	CR/PR	PD-1	Pembrolizumab/Nivolumab	HiSeq 2000(Illumina)
28	Pt34	10.1016/j.cell.2016.02.065	13.9333	Alive	42	Male	M1c	CR/PR	PD-1	Pembrolizumab/Nivolumab	HiSeq 2000(Illumina)
29	Pt35	10.1016/j.cell.2016.02.065	14.2333	Alive	65	Female	M1c	CR/PR	PD-1	Pembrolizumab/Nivolumab	HiSeq 2000(Illumina)
30	Pt36	10.1016/j.cell.2016.02.065	27.9	Deceased	61	Female	M1a	PD	PD-1	Pembrolizumab/Nivolumab	HiSeq 2000(Illumina)
31	Pt37	10.1016/j.cell.2016.02.065	12.1333	Alive	70	Female	M1c	CR/PR	PD-1	Pembrolizumab/Nivolumab	HiSeq 2000(Illumina)
32	Pt38	10.1016/j.cell.2016.02.065	14.9333	Alive	57	Female	M1c	CR/PR	PD-1	Pembrolizumab/Nivolumab	HiSeq 2000(Illumina)
33	Pt4	10.1016/j.cell.2016.02.065	31.6	Alive	62	Male	M1c	CR/PR	PD-1	Pembrolizumab/Nivolumab	HiSeq 2000(Illumina)
34	Pt5	10.1016/j.cell.2016.02.065	14.6333	Alive	61	Male	M1c	CR/PR	PD-1	Pembrolizumab/Nivolumab	HiSeq 2000(Illumina)
35	Pt6	10.1016/j.cell.2016.02.065	29.4	Alive	51	Male	M1c	CR/PR	PD-1	Pembrolizumab/Nivolumab	HiSeq 2000(Illumina)
36	Pt7	10.1016/j.cell.2016.02.065	22.0667	Deceased	55	Female	M1c	PD	PD-1	Pembrolizumab/Nivolumab	HiSeq 2000(Illumina)
37	Pt8	10.1016/j.cell.2016.02.065	NA	Alive	69	Male	M1a	CR/PR	PD-1	Pembrolizumab/Nivolumab	HiSeq 2000(Illumina)
38	Pt9	10.1016/j.cell.2016.02.065	35.1333	Alive	68	Male	M0	CR/PR	PD-1	Pembrolizumab/Nivolumab	HiSeq 2000(Illumina)
39	pt211	10.1016/j.cell.2017.09.028	38.1333	Alive	NA	NA	NA	CR/PR	PD-1	Nivolumab	HiSeq 2000/2500(Illumina)
40	pt212	10.1016/j.cell.2017.09.028	21.1	Deceased	NA	NA	M1b	SD	PD-1	Nivolumab	HiSeq 2000/2500(Illumina)
41	pt213	10.1016/j.cell.2017.09.028	7.4	Deceased	NA	NA	M1c	PD	PD-1	Nivolumab	HiSeq 2000/2500(Illumina)
42	pt215	10.1016/j.cell.2017.09.028	38.3	Alive	NA	NA	M1c	CR/PR	PD-1	Nivolumab	HiSeq 2000/2500(Illumina)
43	pt216	10.1016/j.cell.2017.09.028	8.63333	Deceased	NA	NA	M0	PD	PD-1	Nivolumab	HiSeq 2000/2500(Illumina)
44	pt217	10.1016/j.cell.2017.09.028	3.06667	Deceased	NA	NA	M1c	PD	PD-1	Nivolumab	HiSeq 2000/2500(Illumina)
45	pt218	10.1016/j.cell.2017.09.028	8.53333	Deceased	NA	NA	M1a	SD	PD-1	Nivolumab	HiSeq 2000/2500(Illumina)
46	pt219	10.1016/j.cell.2017.09.028	27.9	Deceased	NA	NA	NA	PD	PD-1	Nivolumab	HiSeq 2000/2500(Illumina)
47	pt221	10.1016/j.cell.2017.09.028	9.33333	Deceased	NA	NA	NA	PD	PD-1	Nivolumab	HiSeq 2000/2500(Illumina)
48	pt225	10.1016/j.cell.2017.09.028	1.9	Deceased	NA	NA	M1c	PD	CTLA-4 plus PD-1	Ipilimumab+Nivolumab	HiSeq 2000/2500(Illumina)
49	pt226	10.1016/j.cell.2017.09.028	35.7667	Alive	NA	NA	M1a	CR/PR	PD-1	Nivolumab	HiSeq 2000/2500(Illumina)
50	pt231	10.1016/j.cell.2017.09.028	1.73333	Deceased	NA	NA	M1c	SD	PD-1	Nivolumab	HiSeq 2000/2500(Illumina)
51	pt232	10.1016/j.cell.2017.09.028	4.96667	Alive	NA	NA	M1c	PD	PD-1	Nivolumab	HiSeq 2000/2500(Illumina)
52	pt233	10.1016/j.cell.2017.09.028	3.36667	Deceased	NA	NA	M1c	PD	PD-1	Nivolumab	HiSeq 2000/2500(Illumina)
53	pt234	10.1016/j.cell.2017.09.028	31.7333	Alive	NA	NA	M1b	SD	PD-1	Nivolumab	HiSeq 2000/2500(Illumina)
54	pt235	10.1016/j.cell.2017.09.028	15.8333	Deceased	NA	NA	M1c	PD	PD-1	Nivolumab	HiSeq 2000/2500(Illumina)
55	pt236	10.1016/j.cell.2017.09.028	24.6667	Deceased	NA	NA	NA	PD	PD-1	Nivolumab	HiSeq 2000/2500(Illumina)
56	pt237	10.1016/j.cell.2017.09.028	9.1	Deceased	NA	NA	M1c	PD	PD-1	Nivolumab	HiSeq 2000/2500(Illumina)
57	pt238	10.1016/j.cell.2017.09.028	35.1	Alive	NA	NA	M1a	CR/PR	PD-1	Nivolumab	HiSeq 2000/2500(Illumina)
58	pt239	10.1016/j.cell.2017.09.028	32.0333	Alive	NA	NA	M1a	PD	PD-1	Nivolumab	HiSeq 2000/2500(Illumina)
59	pt240	10.1016/j.cell.2017.09.028	3.8	Alive	NA	NA	M1c	PD	CTLA-4 plus PD-1	Ipilimumab+Nivolumab	HiSeq 2000/2500(Illumina)
60	pt242	10.1016/j.cell.2017.09.028	27.8	Alive	NA	NA	M1b	CR/PR	CTLA-4 plus PD-1	Ipilimumab+Nivolumab	HiSeq 2000/2500(Illumina)
61	pt244	10.1016/j.cell.2017.09.028	36.0333	Alive	NA	NA	M1c	SD	CTLA-4 plus PD-1	Ipilimumab+Nivolumab	HiSeq 2000/2500(Illumina)
62	pt245	10.1016/j.cell.2017.09.028	21.5333	Deceased	NA	NA	M1a	SD	CTLA-4 plus PD-1	Ipilimumab+Nivolumab	HiSeq 2000/2500(Illumina)
63	pt246	10.1016/j.cell.2017.09.028	5.56667	Deceased	NA	NA	M1c	SD	CTLA-4 plus PD-1	Ipilimumab+Nivolumab	HiSeq 2000/2500(Illumina)
64	pt252	10.1016/j.cell.2017.09.028	36.4333	Alive	NA	NA	NA	CR/PR	PD-1	Nivolumab	HiSeq 2000/2500(Illumina)
65	pt254	10.1016/j.cell.2017.09.028	7.56667	Deceased	NA	NA	M1a	PD	CTLA-4 plus PD-1	Ipilimumab+Nivolumab	HiSeq 2000/2500(Illumina)
66	pt255	10.1016/j.cell.2017.09.028	23.9333	Deceased	NA	NA	M1b	PD	CTLA-4 plus PD-1	Ipilimumab+Nivolumab	HiSeq 2000/2500(Illumina)
67	pt256	10.1016/j.cell.2017.09.028	34.8667	Alive	NA	NA	M1c	CR/PR	CTLA-4 plus PD-1	Ipilimumab+Nivolumab	HiSeq 2000/2500(Illumina)
68	pt257	10.1016/j.cell.2017.09.028	27.5667	Alive	NA	NA	NA	CR/PR	CTLA-4 plus PD-1	Ipilimumab+Nivolumab	HiSeq 2000/2500(Illumina)
69	pt259	10.1016/j.cell.2017.09.028	1.9	Alive	NA	NA	M1a	PD	CTLA-4 plus PD-1	Ipilimumab+Nivolumab	HiSeq 2000/2500(Illumina)
70	pt260	10.1016/j.cell.2017.09.028	15.8667	Deceased	NA	NA	M1c	PD	CTLA-4 plus PD-1	Ipilimumab+Nivolumab	HiSeq 2000/2500(Illumina)
71	pt261	10.1016/j.cell.2017.09.028	14.4333	Deceased	NA	NA	M1c	CR/PR	CTLA-4 plus PD-1	Ipilimumab+Nivolumab	HiSeq 2000/2500(Illumina)
72	pt262	10.1016/j.cell.2017.09.028	28.8333	Alive	NA	NA	NA	CR/PR	CTLA-4 plus PD-1	Ipilimumab+Nivolumab	HiSeq 2000/2500(Illumina)
73	pt266	10.1016/j.cell.2017.09.028	16.6333	Deceased	NA	NA	M1c	SD	CTLA-4 plus PD-1	Ipilimumab+Nivolumab	HiSeq 2000/2500(Illumina)
74	pt267	10.1016/j.cell.2017.09.028	23.6	Deceased	NA	NA	M1a	SD	PD-1	Nivolumab	HiSeq 2000/2500(Illumina)
75	pt268	10.1016/j.cell.2017.09.028	24.6	Alive	NA	NA	M1a	PD	PD-1	Nivolumab	HiSeq 2000/2500(Illumina)
76	pt273	10.1016/j.cell.2017.09.028	23.0667	Alive	NA	NA	M1b	SD	CTLA-4 plus PD-1	Ipilimumab+Nivolumab	HiSeq 2000/2500(Illumina)
77	pt274	10.1016/j.cell.2017.09.028	18.0667	Deceased	NA	NA	NA	PD	PD-1	Nivolumab	HiSeq 2000/2500(Illumina)
78	pt275	10.1016/j.cell.2017.09.028	34.4	Alive	NA	NA	M1c	SD	CTLA-4 plus PD-1	Ipilimumab+Nivolumab	HiSeq 2000/2500(Illumina)
79	pt276	10.1016/j.cell.2017.09.028	28.0667	Alive	NA	NA	M1b	CR/PR	CTLA-4 plus PD-1	Ipilimumab+Nivolumab	HiSeq 2000/2500(Illumina)
80	pt278	10.1016/j.cell.2017.09.028	10.3667	Deceased	NA	NA	M1c	SD	CTLA-4 plus PD-1	Ipilimumab+Nivolumab	HiSeq 2000/2500(Illumina)
81	pt279	10.1016/j.cell.2017.09.028	8.2	Alive	NA	NA	M1c	SD	PD-1	Nivolumab	HiSeq 2000/2500(Illumina)
82	pt280	10.1016/j.cell.2017.09.028	25.6667	Deceased	NA	NA	M1b	CR/PR	PD-1	Nivolumab	HiSeq 2000/2500(Illumina)
83	pt281	10.1016/j.cell.2017.09.028	9.36667	Alive	NA	NA	M1c	SD	PD-1	Nivolumab	HiSeq 2000/2500(Illumina)
84	pt282	10.1016/j.cell.2017.09.028	0.666667	Deceased	NA	NA	M1c	SD	PD-1	Nivolumab	HiSeq 2000/2500(Illumina)
85	pt284	10.1016/j.cell.2017.09.028	0.333333	Deceased	NA	NA	M1c	SD	PD-1	Nivolumab	HiSeq 2000/2500(Illumina)
86	pt285	10.1016/j.cell.2017.09.028	15.7	Deceased	NA	NA	M1a	SD	PD-1	Nivolumab	HiSeq 2000/2500(Illumina)
87	pt287	10.1016/j.cell.2017.09.028	7.26667	Deceased	NA	NA	NA	SD	CTLA-4 plus PD-1	Ipilimumab+Nivolumab	HiSeq 2000/2500(Illumina)
88	pt290	10.1016/j.cell.2017.09.028	14.3	Deceased	NA	NA	M1c	SD	CTLA-4 plus PD-1	Ipilimumab+Nivolumab	HiSeq 2000/2500(Illumina)
89	pt291	10.1016/j.cell.2017.09.028	15.4	Alive	NA	NA	M1c	SD	CTLA-4 plus PD-1	Ipilimumab+Nivolumab	HiSeq 2000/2500(Illumina)
90	pt292	10.1016/j.cell.2017.09.028	5.03333	Deceased	NA	NA	M1c	PD	PD-1	Nivolumab	HiSeq 2000/2500(Illumina)
91	pt293	10.1016/j.cell.2017.09.028	30.1333	Alive	NA	NA	M1a	PD	CTLA-4 plus PD-1	Ipilimumab+Nivolumab	HiSeq 2000/2500(Illumina)
92	pt294	10.1016/j.cell.2017.09.028	9.06667	Deceased	NA	NA	M1c	PD	CTLA-4 plus PD-1	Ipilimumab+Nivolumab	HiSeq 2000/2500(Illumina)
93	pt295	10.1016/j.cell.2017.09.028	32.4667	Alive	NA	NA	NA	SD	PD-1	Nivolumab	HiSeq 2000/2500(Illumina)
94	pt297	10.1016/j.cell.2017.09.028	28.1333	Deceased	NA	NA	M1a	SD	PD-1	Nivolumab	HiSeq 2000/2500(Illumina)
95	pt298	10.1016/j.cell.2017.09.028	5.8	Deceased	NA	NA	M1c	PD	CTLA-4 plus PD-1	Ipilimumab+Nivolumab	HiSeq 2000/2500(Illumina)
96	pt300	10.1016/j.cell.2017.09.028	11.1	Deceased	NA	NA	NA	SD	CTLA-4 plus PD-1	Ipilimumab+Nivolumab	HiSeq 2000/2500(Illumina)
97	pt301	10.1016/j.cell.2017.09.028	28.3	Alive	NA	NA	M1c	PD	CTLA-4 plus PD-1	Ipilimumab+Nivolumab	HiSeq 2000/2500(Illumina)
98	pt302	10.1016/j.cell.2017.09.028	32.7	Alive	NA	NA	M1c	CR/PR	PD-1	Nivolumab	HiSeq 2000/2500(Illumina)
99	pt306	10.1016/j.cell.2017.09.028	24.9	Deceased	NA	NA	M1c	SD	CTLA-4 plus PD-1	Ipilimumab+Nivolumab	HiSeq 2000/2500(Illumina)
100	pt308	10.1016/j.cell.2017.09.028	28	Deceased	NA	NA	M1c	PD	CTLA-4 plus PD-1	Ipilimumab+Nivolumab	HiSeq 2000/2500(Illumina)
101	pt309	10.1016/j.cell.2017.09.028	27.8	Alive	NA	NA	M1a	CR/PR	CTLA-4 plus PD-1	Ipilimumab+Nivolumab	HiSeq 2000/2500(Illumina)
102	pt310	10.1016/j.cell.2017.09.028	21.2	Alive	NA	NA	NA	SD	PD-1	Nivolumab	HiSeq 2000/2500(Illumina)
103	pt311	10.1016/j.cell.2017.09.028	16.1333	Alive	NA	NA	M1b	PD	CTLA-4 plus PD-1	Ipilimumab+Nivolumab	HiSeq 2000/2500(Illumina)
104	pt312	10.1016/j.cell.2017.09.028	27.2667	Alive	NA	NA	NA	CR/PR	CTLA-4 plus PD-1	Ipilimumab+Nivolumab	HiSeq 2000/2500(Illumina)
105	pt314	10.1016/j.cell.2017.09.028	3.03333	Deceased	NA	NA	M1c	PD	CTLA-4 plus PD-1	Ipilimumab+Nivolumab	HiSeq 2000/2500(Illumina)
106	pt316	10.1016/j.cell.2017.09.028	30.4333	Alive	NA	NA	M1b	SD	CTLA-4 plus PD-1	Ipilimumab+Nivolumab	HiSeq 2000/2500(Illumina)
107	pt0095	10.1056/NEJMoa1406498	69.3667	Alive	74	Male	M1b	CR/PR	CTLA-4	Ipilimumab/Tremelimumab	HiSeq 2000(Illumina)
108	pt0167	10.1056/NEJMoa1406498	32.8667	Alive	33	Male	M1c	CR/PR	CTLA-4	Ipilimumab/Tremelimumab	HiSeq 2000(Illumina)
109	pt0244	10.1056/NEJMoa1406498	25.5667	Alive	49	Male	M1c	CR/PR	CTLA-4	Ipilimumab/Tremelimumab	HiSeq 2000(Illumina)
110	pt0346	10.1056/NEJMoa1406498	35.3	Deceased	43	Female	M1b	CR/PR	CTLA-4	Ipilimumab/Tremelimumab	HiSeq 2000(Illumina)
111	pt03803	10.1056/NEJMoa1406498	96.1333	Deceased	90	Male	M0	CR/PR	CTLA-4	Ipilimumab/Tremelimumab	HiSeq 2000(Illumina)
112	pt04885	10.1056/NEJMoa1406498	25.5667	Alive	49	Female	M0	CR/PR	CTLA-4	Ipilimumab/Tremelimumab	HiSeq 2000(Illumina)
113	pt06670	10.1056/NEJMoa1406498	45.0333	Deceased	79	Female	M0	CR/PR	CTLA-4	Ipilimumab/Tremelimumab	HiSeq 2000(Illumina)
114	pt1120	10.1056/NEJMoa1406498	55.9667	Alive	68	Male	M1a	CR/PR	CTLA-4	Ipilimumab/Tremelimumab	HiSeq 2000(Illumina)
115	pt11217	10.1056/NEJMoa1406498	19.4667	Deceased	66	Male	M1c	CR/PR	CTLA-4	Ipilimumab/Tremelimumab	HiSeq 2000(Illumina)
116	pt1494	10.1056/NEJMoa1406498	24.3333	Alive	70	Male	M1c	CR/PR	CTLA-4	Ipilimumab/Tremelimumab	HiSeq 2000(Illumina)
117	pt1509	10.1056/NEJMoa1406498	54.7667	Alive	54	Female	M1c	CR/PR	CTLA-4	Ipilimumab/Tremelimumab	HiSeq 2000(Illumina)
118	pt1650	10.1056/NEJMoa1406498	32.8667	Deceased	71	Female	M1c	CR/PR	CTLA-4	Ipilimumab/Tremelimumab	HiSeq 2000(Illumina)
119	pt1867	10.1056/NEJMoa1406498	18.2667	Deceased	68	Male	M1c	PD	CTLA-4	Ipilimumab/Tremelimumab	HiSeq 2000(Illumina)
120	pt2051	10.1056/NEJMoa1406498	9.73333	Deceased	61	Female	M1c	PD	CTLA-4	Ipilimumab/Tremelimumab	HiSeq 2000(Illumina)
121	pt2056	10.1056/NEJMoa1406498	47.4667	Alive	39	Female	M1b	CR/PR	CTLA-4	Ipilimumab/Tremelimumab	HiSeq 2000(Illumina)
122	pt2057	10.1056/NEJMoa1406498	40.1667	Alive	36	Female	M1c	CR/PR	CTLA-4	Ipilimumab/Tremelimumab	HiSeq 2000(Illumina)
123	pt2137	10.1056/NEJMoa1406498	9.73333	Deceased	18	Male	M1c	PD	CTLA-4	Ipilimumab/Tremelimumab	HiSeq 2000(Illumina)
124	pt22640	10.1056/NEJMoa1406498	52.3333	Alive	71	Male	M1c	CR/PR	CTLA-4	Ipilimumab/Tremelimumab	HiSeq 2000(Illumina)
125	pt2472	10.1056/NEJMoa1406498	20.7	Alive	71	Male	M1c	CR/PR	CTLA-4	Ipilimumab/Tremelimumab	HiSeq 2000(Illumina)
126	pt3086	10.1056/NEJMoa1406498	31.6333	Deceased	43	Male	M1c	CR/PR	CTLA-4	Ipilimumab/Tremelimumab	HiSeq 2000(Illumina)
127	pt3156	10.1056/NEJMoa1406498	13.4	Deceased	68	Female	M1b	PD	CTLA-4	Ipilimumab/Tremelimumab	HiSeq 2000(Illumina)
128	pt3484	10.1056/NEJMoa1406498	35.3	Alive	74	Male	M1c	CR/PR	CTLA-4	Ipilimumab/Tremelimumab	HiSeq 2000(Illumina)
129	pt3549	10.1056/NEJMoa1406498	6.1	Deceased	50	Male	M1c	PD	CTLA-4	Ipilimumab/Tremelimumab	HiSeq 2000(Illumina)
130	pt3665	10.1056/NEJMoa1406498	32.8667	Alive	70	Male	M1b	CR/PR	CTLA-4	Ipilimumab/Tremelimumab	HiSeq 2000(Illumina)
131	pt4018	10.1056/NEJMoa1406498	3.66667	Deceased	55	Male	M1c	PD	CTLA-4	Ipilimumab/Tremelimumab	HiSeq 2000(Illumina)
132	pt4035	10.1056/NEJMoa1406498	51.1	Alive	78	Male	M1c	CR/PR	CTLA-4	Ipilimumab/Tremelimumab	HiSeq 2000(Illumina)
133	pt4045	10.1056/NEJMoa1406498	20.7	Deceased	42	Male	M1c	PD	CTLA-4	Ipilimumab/Tremelimumab	HiSeq 2000(Illumina)
134	pt4046	10.1056/NEJMoa1406498	25.5667	Alive	44	Male	M1a	CR/PR	CTLA-4	Ipilimumab/Tremelimumab	HiSeq 2000(Illumina)
135	pt4077	10.1056/NEJMoa1406498	74.2333	Alive	75	Male	M1c	CR/PR	CTLA-4	Ipilimumab/Tremelimumab	HiSeq 2000(Illumina)
136	pt4083	10.1056/NEJMoa1406498	2.43333	Deceased	54	Male	M1c	PD	CTLA-4	Ipilimumab/Tremelimumab	HiSeq 2000(Illumina)
137	pt4091	10.1056/NEJMoa1406498	73	Alive	65	Female	M1a	CR/PR	CTLA-4	Ipilimumab/Tremelimumab	HiSeq 2000(Illumina)
138	pt4092	10.1056/NEJMoa1406498	74.2333	Alive	57	Female	M1a	CR/PR	CTLA-4	Ipilimumab/Tremelimumab	HiSeq 2000(Illumina)
139	pt4631	10.1056/NEJMoa1406498	6.1	Deceased	59	Male	M1c	PD	CTLA-4	Ipilimumab/Tremelimumab	HiSeq 2000(Illumina)
140	pt4691	10.1056/NEJMoa1406498	88.8333	Alive	62	Male	M1c	CR/PR	CTLA-4	Ipilimumab/Tremelimumab	HiSeq 2000(Illumina)
141	pt4744	10.1056/NEJMoa1406498	25.5667	Alive	52	Male	M1c	CR/PR	CTLA-4	Ipilimumab/Tremelimumab	HiSeq 2000(Illumina)
142	pt4810	10.1056/NEJMoa1406498	4.86667	Deceased	48	Female	M1c	PD	CTLA-4	Ipilimumab/Tremelimumab	HiSeq 2000(Illumina)
143	pt4880	10.1056/NEJMoa1406498	65.7	Alive	63	Male	M1b	CR/PR	CTLA-4	Ipilimumab/Tremelimumab	HiSeq 2000(Illumina)
144	pt4941	10.1056/NEJMoa1406498	87.6	Alive	40	Female	M1c	CR/PR	CTLA-4	Ipilimumab/Tremelimumab	HiSeq 2000(Illumina)
145	pt4949	10.1056/NEJMoa1406498	8.53333	Deceased	79	Female	M1c	PD	CTLA-4	Ipilimumab/Tremelimumab	HiSeq 2000(Illumina)
146	pt5038	10.1056/NEJMoa1406498	14.6	Deceased	55	Male	M1c	PD	CTLA-4	Ipilimumab/Tremelimumab	HiSeq 2000(Illumina)
147	pt5118	10.1056/NEJMoa1406498	32.8667	Deceased	55	Female	M1c	PD	CTLA-4	Ipilimumab/Tremelimumab	HiSeq 2000(Illumina)
148	pt5784	10.1056/NEJMoa1406498	6.1	Deceased	58	Female	M1c	PD	CTLA-4	Ipilimumab/Tremelimumab	HiSeq 2000(Illumina)
149	pt5934	10.1056/NEJMoa1406498	19.4667	Deceased	52	Male	M1c	PD	CTLA-4	Ipilimumab/Tremelimumab	HiSeq 2000(Illumina)
150	pt6126	10.1056/NEJMoa1406498	23.1333	Alive	66	Female	M1b	CR/PR	CTLA-4	Ipilimumab/Tremelimumab	HiSeq 2000(Illumina)
151	pt6161	10.1056/NEJMoa1406498	31.6333	Deceased	81	Male	M1b	CR/PR	CTLA-4	Ipilimumab/Tremelimumab	HiSeq 2000(Illumina)
152	pt6336	10.1056/NEJMoa1406498	83.9667	Alive	53	Male	M1c	CR/PR	CTLA-4	Ipilimumab/Tremelimumab	HiSeq 2000(Illumina)
153	pt6494	10.1056/NEJMoa1406498	8.53333	Deceased	63	Female	M1c	PD	CTLA-4	Ipilimumab/Tremelimumab	HiSeq 2000(Illumina)
154	pt6689	10.1056/NEJMoa1406498	14.6	Deceased	46	Female	M1c	PD	CTLA-4	Ipilimumab/Tremelimumab	HiSeq 2000(Illumina)
155	pt6721	10.1056/NEJMoa1406498	9.73333	Deceased	64	Male	M1a	PD	CTLA-4	Ipilimumab/Tremelimumab	HiSeq 2000(Illumina)
156	pt6819	10.1056/NEJMoa1406498	41.3667	Alive	55	Male	M1c	CR/PR	CTLA-4	Ipilimumab/Tremelimumab	HiSeq 2000(Illumina)
157	pt6842	10.1056/NEJMoa1406498	9.73333	Deceased	64	Male	M1c	PD	CTLA-4	Ipilimumab/Tremelimumab	HiSeq 2000(Illumina)
158	pt7357	10.1056/NEJMoa1406498	24.3333	Deceased	50	Female	M1c	PD	CTLA-4	Ipilimumab/Tremelimumab	HiSeq 2000(Illumina)
159	pt7623	10.1056/NEJMoa1406498	48.6667	Alive	62	Male	M1c	CR/PR	CTLA-4	Ipilimumab/Tremelimumab	HiSeq 2000(Illumina)
160	pt8815	10.1056/NEJMoa1406498	14.6	Deceased	67	Female	M1b	PD	CTLA-4	Ipilimumab/Tremelimumab	HiSeq 2000(Illumina)
161	pt9298	10.1056/NEJMoa1406498	51.1	Alive	82	Female	M1c	CR/PR	CTLA-4	Ipilimumab/Tremelimumab	HiSeq 2000(Illumina)
162	pt9306	10.1056/NEJMoa1406498	64.5	Alive	65	Male	M1c	CR/PR	CTLA-4	Ipilimumab/Tremelimumab	HiSeq 2000(Illumina)
163	pt9341	10.1056/NEJMoa1406498	12.1667	Deceased	77	Male	M1a	PD	CTLA-4	Ipilimumab/Tremelimumab	HiSeq 2000(Illumina)
164	pt9445	10.1056/NEJMoa1406498	2.43333	Deceased	50	Male	M1c	PD	CTLA-4	Ipilimumab/Tremelimumab	HiSeq 2000(Illumina)
165	pt9449	10.1056/NEJMoa1406498	7.3	Deceased	64	Female	M1c	PD	CTLA-4	Ipilimumab/Tremelimumab	HiSeq 2000(Illumina)
166	pt9521	10.1056/NEJMoa1406498	32.8667	Deceased	74	Male	M1b	PD	CTLA-4	Ipilimumab/Tremelimumab	HiSeq 2000(Illumina)
167	pt9699	10.1056/NEJMoa1406498	53.5333	Alive	70	Male	M1c	CR/PR	CTLA-4	Ipilimumab/Tremelimumab	HiSeq 2000(Illumina)
168	pt9705	10.1056/NEJMoa1406498	14.6	Deceased	63	Female	M1c	PD	CTLA-4	Ipilimumab/Tremelimumab	HiSeq 2000(Illumina)
169	pt9765	10.1056/NEJMoa1406498	25.5667	Deceased	38	Female	M1b	PD	CTLA-4	Ipilimumab/Tremelimumab	HiSeq 2000(Illumina)
170	pt39	10.1056/NEJMoa1604958	23.0333	NA	58	Male	M1c	CR/PR	PD-1	Pembrolizumab	HiSeq 2000(Illumina)
171	pt40	10.1056/NEJMoa1604958	31.5	NA	60	Male	M1b	CR/PR	PD-1	Pembrolizumab	HiSeq 2000(Illumina)
172	pt41	10.1056/NEJMoa1604958	32.4667	NA	70	Male	M1c	CR/PR	PD-1	Pembrolizumab	HiSeq 2000(Illumina)
173	pt42	10.1056/NEJMoa1604958	42.0667	NA	61	Male	M1c	CR/PR	PD-1	Pembrolizumab	HiSeq 2000(Illumina)
174	pt100	10.1126/science.aad0095	3.33333	Deceased	61	Female	M1c	PD	CTLA-4	Ipilimumab	HiSeq 2500(Illumina)
175	pt101	10.1126/science.aad0095	32.9	Alive	71	Male	M1b	CR/PR	CTLA-4	Ipilimumab	HiSeq 2500(Illumina)
176	pt102	10.1126/science.aad0095	5.36667	Deceased	33	Male	M1c	PD	CTLA-4	Ipilimumab	HiSeq 2500(Illumina)
177	pt103	10.1126/science.aad0095	35	Alive	36	Male	M0	SD	CTLA-4	Ipilimumab	HiSeq 2500(Illumina)
178	pt104	10.1126/science.aad0095	4.66667	Deceased	73	Male	M1c	PD	CTLA-4	Ipilimumab	HiSeq 2500(Illumina)
179	pt105	10.1126/science.aad0095	12	Deceased	70	Male	M1c	PD	CTLA-4	Ipilimumab	HiSeq 2500(Illumina)
180	pt106	10.1126/science.aad0095	9.6	Deceased	75	Male	M1c	PD	CTLA-4	Ipilimumab	HiSeq 2500(Illumina)
181	pt107	10.1126/science.aad0095	34.9333	Deceased	70	Male	M1c	CR/PR	CTLA-4	Ipilimumab	HiSeq 2500(Illumina)
182	pt108	10.1126/science.aad0095	7.9	Deceased	45	Female	M1c	SD	CTLA-4	Ipilimumab	HiSeq 2500(Illumina)
183	pt109	10.1126/science.aad0095	34.9	Alive	41	Male	M0	CR/PR	CTLA-4	Ipilimumab	HiSeq 2500(Illumina)
184	pt110	10.1126/science.aad0095	8.33333	Deceased	43	Female	M1b	PD	CTLA-4	Ipilimumab	HiSeq 2500(Illumina)
185	pt111	10.1126/science.aad0095	2.76667	Deceased	69	Male	M1b	PD	CTLA-4	Ipilimumab	HiSeq 2500(Illumina)
186	pt112	10.1126/science.aad0095	26.3333	Alive	67	Male	M1c	PD	CTLA-4	Ipilimumab	HiSeq 2500(Illumina)
187	pt113	10.1126/science.aad0095	10.6667	Deceased	76	Male	M1b	PD	CTLA-4	Ipilimumab	HiSeq 2500(Illumina)
188	pt114	10.1126/science.aad0095	10.0333	Deceased	68	Male	M1c	CR/PR	CTLA-4	Ipilimumab	HiSeq 2500(Illumina)
189	pt115	10.1126/science.aad0095	4.83333	Deceased	45	Male	M1c	PD	CTLA-4	Ipilimumab	HiSeq 2500(Illumina)
190	pt116	10.1126/science.aad0095	30.4667	Alive	73	Male	M1c	CR/PR	CTLA-4	Ipilimumab	HiSeq 2500(Illumina)
191	pt117	10.1126/science.aad0095	10.4333	Deceased	43	Female	M1c	PD	CTLA-4	Ipilimumab	HiSeq 2500(Illumina)
192	pt118	10.1126/science.aad0095	26.9333	Alive	61	Male	M0	PD	CTLA-4	Ipilimumab	HiSeq 2500(Illumina)
193	pt119	10.1126/science.aad0095	4.06667	Deceased	46	Male	M1c	PD	CTLA-4	Ipilimumab	HiSeq 2500(Illumina)
194	pt120	10.1126/science.aad0095	28.4333	Deceased	50	Female	M1c	SD	CTLA-4	Ipilimumab	HiSeq 2500(Illumina)
195	pt121	10.1126/science.aad0095	4.86667	Deceased	78	Male	M1b	PD	CTLA-4	Ipilimumab	HiSeq 2500(Illumina)
196	pt122	10.1126/science.aad0095	21.3667	Alive	77	Male	M1b	CR/PR	CTLA-4	Ipilimumab	HiSeq 2500(Illumina)
197	pt123	10.1126/science.aad0095	11.0667	Deceased	25	Female	M1c	PD	CTLA-4	Ipilimumab	HiSeq 2500(Illumina)
198	pt124	10.1126/science.aad0095	3.76667	Deceased	29	Male	M1c	PD	CTLA-4	Ipilimumab	HiSeq 2500(Illumina)
199	pt125	10.1126/science.aad0095	17.9667	Alive	18	Male	M1b	PD	CTLA-4	Ipilimumab	HiSeq 2500(Illumina)
200	pt126	10.1126/science.aad0095	24.4	Deceased	78	Male	M0	PD	CTLA-4	Ipilimumab	HiSeq 2500(Illumina)
201	pt127	10.1126/science.aad0095	1.5	Deceased	76	Male	M1c	PD	CTLA-4	Ipilimumab	HiSeq 2500(Illumina)
202	pt128	10.1126/science.aad0095	8.56667	Deceased	32	Male	M1c	SD	CTLA-4	Ipilimumab	HiSeq 2500(Illumina)
203	pt129	10.1126/science.aad0095	22.5333	Alive	81	Male	M1c	CR/PR	CTLA-4	Ipilimumab	HiSeq 2500(Illumina)
204	pt130	10.1126/science.aad0095	18.0667	Deceased	76	Male	M1b	PD	CTLA-4	Ipilimumab	HiSeq 2500(Illumina)
205	pt131	10.1126/science.aad0095	2.7	Deceased	29	Female	M1c	PD	CTLA-4	Ipilimumab	HiSeq 2500(Illumina)
206	pt132	10.1126/science.aad0095	49.2667	Deceased	39	Female	M1c	SD	CTLA-4	Ipilimumab	HiSeq 2500(Illumina)
207	pt133	10.1126/science.aad0095	3.3	Deceased	58	Male	M1c	PD	CTLA-4	Ipilimumab	HiSeq 2500(Illumina)
208	pt134	10.1126/science.aad0095	5.43333	Deceased	48	Female	M1c	PD	CTLA-4	Ipilimumab	HiSeq 2500(Illumina)
209	pt135	10.1126/science.aad0095	16.4	Deceased	62	Male	M1c	PD	CTLA-4	Ipilimumab	HiSeq 2500(Illumina)
210	pt136	10.1126/science.aad0095	5.1	Deceased	71	Male	M1c	PD	CTLA-4	Ipilimumab	HiSeq 2500(Illumina)
211	pt137	10.1126/science.aad0095	7.46667	Deceased	63	Male	M1a	PD	CTLA-4	Ipilimumab	HiSeq 2500(Illumina)
212	pt138	10.1126/science.aad0095	2.8	Deceased	35	Female	M1c	PD	CTLA-4	Ipilimumab	HiSeq 2500(Illumina)
213	pt139	10.1126/science.aad0095	1.66667	Deceased	32	Male	M1c	PD	CTLA-4	Ipilimumab	HiSeq 2500(Illumina)
214	pt140	10.1126/science.aad0095	6.8	Deceased	68	Male	M1c	PD	CTLA-4	Ipilimumab	HiSeq 2500(Illumina)
215	pt141	10.1126/science.aad0095	2.86667	Deceased	69	Female	M1c	SD	CTLA-4	Ipilimumab	HiSeq 2500(Illumina)
216	pt142	10.1126/science.aad0095	28.0667	Alive	51	Male	M1b	PD	CTLA-4	Ipilimumab	HiSeq 2500(Illumina)
217	pt143	10.1126/science.aad0095	27.0333	Deceased	68	Female	M1b	PD	CTLA-4	Ipilimumab	HiSeq 2500(Illumina)
218	pt144	10.1126/science.aad0095	5.06667	Deceased	79	Male	M1c	PD	CTLA-4	Ipilimumab	HiSeq 2500(Illumina)
219	pt145	10.1126/science.aad0095	7.03333	Deceased	55	Female	M1c	PD	CTLA-4	Ipilimumab	HiSeq 2500(Illumina)
220	pt146	10.1126/science.aad0095	24.9667	Alive	54	Male	M1c	PD	CTLA-4	Ipilimumab	HiSeq 2500(Illumina)
221	pt147	10.1126/science.aad0095	3.83333	Deceased	50	Female	M1c	PD	CTLA-4	Ipilimumab	HiSeq 2500(Illumina)
222	pt148	10.1126/science.aad0095	2.56667	Deceased	31	Male	M1c	SD	CTLA-4	Ipilimumab	HiSeq 2500(Illumina)
223	pt149	10.1126/science.aad0095	13.6	Deceased	50	Male	M1c	PD	CTLA-4	Ipilimumab	HiSeq 2500(Illumina)
224	pt150	10.1126/science.aad0095	2.23333	Deceased	68	Male	M1c	SD	CTLA-4	Ipilimumab	HiSeq 2500(Illumina)
225	pt151	10.1126/science.aad0095	6.83333	Deceased	44	Male	M1c	PD	CTLA-4	Ipilimumab	HiSeq 2500(Illumina)
226	pt152	10.1126/science.aad0095	3.6	Deceased	48	Male	M1c	PD	CTLA-4	Ipilimumab	HiSeq 2500(Illumina)
227	pt153	10.1126/science.aad0095	15.5333	Deceased	66	Male	M1a	PD	CTLA-4	Ipilimumab	HiSeq 2500(Illumina)
228	pt154	10.1126/science.aad0095	22.9333	Alive	57	Female	M1a	CR/PR	CTLA-4	Ipilimumab	HiSeq 2500(Illumina)
229	pt155	10.1126/science.aad0095	3	Deceased	67	Female	M1a	SD	CTLA-4	Ipilimumab	HiSeq 2500(Illumina)
230	pt156	10.1126/science.aad0095	26.6	Alive	55	Female	M0	PD	CTLA-4	Ipilimumab	HiSeq 2500(Illumina)
231	pt157	10.1126/science.aad0095	5.83333	Deceased	59	Male	M1c	PD	CTLA-4	Ipilimumab	HiSeq 2500(Illumina)
232	pt158	10.1126/science.aad0095	22.5333	Deceased	81	Male	M1c	SD	CTLA-4	Ipilimumab	HiSeq 2500(Illumina)
233	pt159	10.1126/science.aad0095	32.3667	Alive	74	Female	M1b	CR/PR	CTLA-4	Ipilimumab	HiSeq 2500(Illumina)
234	pt160	10.1126/science.aad0095	10.8333	Deceased	69	Male	M1c	PD	CTLA-4	Ipilimumab	HiSeq 2500(Illumina)
235	pt161	10.1126/science.aad0095	45.9667	Alive	61	Male	M1c	PD	CTLA-4	Ipilimumab	HiSeq 2500(Illumina)
236	pt162	10.1126/science.aad0095	39.4667	Deceased	77	Male	M1c	PD	CTLA-4	Ipilimumab	HiSeq 2500(Illumina)
237	pt163	10.1126/science.aad0095	44.2	Alive	82	Male	M1c	SD	CTLA-4	Ipilimumab	HiSeq 2500(Illumina)
238	pt164	10.1126/science.aad0095	4.9	Deceased	72	Male	M1c	PD	CTLA-4	Ipilimumab	HiSeq 2500(Illumina)
239	pt165	10.1126/science.aad0095	7.03333	Deceased	65	Male	M1c	PD	CTLA-4	Ipilimumab	HiSeq 2500(Illumina)
240	pt166	10.1126/science.aad0095	1.8	Deceased	52	Female	M1c	PD	CTLA-4	Ipilimumab	HiSeq 2500(Illumina)
241	pt167	10.1126/science.aad0095	2.33333	Deceased	47	Female	M1c	PD	CTLA-4	Ipilimumab	HiSeq 2500(Illumina)
242	pt168	10.1126/science.aad0095	51.3	Alive	45	Male	M1c	CR/PR	CTLA-4	Ipilimumab	HiSeq 2500(Illumina)
243	pt169	10.1126/science.aad0095	49.5667	Alive	67	Male	M1b	CR/PR	CTLA-4	Ipilimumab	HiSeq 2500(Illumina)
244	pt170	10.1126/science.aad0095	1.13333	Deceased	74	Male	M1c	PD	CTLA-4	Ipilimumab	HiSeq 2500(Illumina)
245	pt171	10.1126/science.aad0095	4.26667	Deceased	64	Male	M1c	PD	CTLA-4	Ipilimumab	HiSeq 2500(Illumina)
246	pt172	10.1126/science.aad0095	1.23333	Deceased	75	Female	M1b	PD	CTLA-4	Ipilimumab	HiSeq 2500(Illumina)
247	pt173	10.1126/science.aad0095	9.03333	Deceased	57	Female	M1c	PD	CTLA-4	Ipilimumab	HiSeq 2500(Illumina)
248	pt174	10.1126/science.aad0095	2.96667	Deceased	68	Male	M1c	PD	CTLA-4	Ipilimumab	HiSeq 2500(Illumina)
249	pt175	10.1126/science.aad0095	5.33333	Deceased	36	Female	M1b	PD	CTLA-4	Ipilimumab	HiSeq 2500(Illumina)
250	pt176	10.1126/science.aad0095	36.8667	Alive	78	Male	M1c	CR/PR	CTLA-4	Ipilimumab	HiSeq 2500(Illumina)
251	pt177	10.1126/science.aad0095	34.4667	Alive	36	Male	M1c	SD	CTLA-4	Ipilimumab	HiSeq 2500(Illumina)
252	pt178	10.1126/science.aad0095	2.16667	Deceased	77	Male	M1c	PD	CTLA-4	Ipilimumab	HiSeq 2500(Illumina)
253	pt179	10.1126/science.aad0095	6.93333	Deceased	73	Male	M1c	PD	CTLA-4	Ipilimumab	HiSeq 2500(Illumina)
254	pt180	10.1126/science.aad0095	6.43333	Deceased	71	Female	M1c	PD	CTLA-4	Ipilimumab	HiSeq 2500(Illumina)
255	pt181	10.1126/science.aad0095	7.83333	Deceased	68	Male	M1c	PD	CTLA-4	Ipilimumab	HiSeq 2500(Illumina)
256	pt182	10.1126/science.aad0095	8.33333	Deceased	69	Male	M0	PD	CTLA-4	Ipilimumab	HiSeq 2500(Illumina)
257	pt183	10.1126/science.aad0095	21.7333	Deceased	59	Female	M0	PD	CTLA-4	Ipilimumab	HiSeq 2500(Illumina)
258	pt184	10.1126/science.aad0095	7.46667	Deceased	36	Male	M1b	PD	CTLA-4	Ipilimumab	HiSeq 2500(Illumina)
259	pt185	10.1126/science.aad0095	9.06667	Deceased	86	Male	M1c	PD	CTLA-4	Ipilimumab	HiSeq 2500(Illumina)
260	pt186	10.1126/science.aad0095	20.0667	Deceased	76	Male	M1c	PD	CTLA-4	Ipilimumab	HiSeq 2500(Illumina)
261	pt187	10.1126/science.aad0095	34.6333	Alive	65	Male	M0	CR/PR	CTLA-4	Ipilimumab	HiSeq 2500(Illumina)
262	pt188	10.1126/science.aad0095	3.53333	Deceased	83	Male	M1c	PD	CTLA-4	Ipilimumab	HiSeq 2500(Illumina)
263	pt189	10.1126/science.aad0095	21.7667	Alive	44	Female	M0	SD	CTLA-4	Ipilimumab	HiSeq 2500(Illumina)
264	pt190	10.1126/science.aad0095	2.63333	Deceased	39	Male	M1c	PD	CTLA-4	Ipilimumab	HiSeq 2500(Illumina)
265	pt191	10.1126/science.aad0095	17.7333	Deceased	38	Male	M1c	PD	CTLA-4	Ipilimumab	HiSeq 2500(Illumina)
266	pt192	10.1126/science.aad0095	4.56667	Deceased	63	Male	M1c	PD	CTLA-4	Ipilimumab	HiSeq 2500(Illumina)
267	pt193	10.1126/science.aad0095	14.7333	Deceased	71	Male	M1c	CR/PR	CTLA-4	Ipilimumab	HiSeq 2500(Illumina)
268	pt194	10.1126/science.aad0095	6.43333	Deceased	73	Male	M1c	PD	CTLA-4	Ipilimumab	HiSeq 2500(Illumina)
269	pt195	10.1126/science.aad0095	4.63333	Deceased	74	Male	M1c	PD	CTLA-4	Ipilimumab	HiSeq 2500(Illumina)
270	pt196	10.1126/science.aad0095	34.3	Alive	21	Male	M0	CR/PR	CTLA-4	Ipilimumab	HiSeq 2500(Illumina)
271	pt197	10.1126/science.aad0095	1.26667	Deceased	71	Female	M1c	PD	CTLA-4	Ipilimumab	HiSeq 2500(Illumina)
272	pt198	10.1126/science.aad0095	26.7	Deceased	69	Male	M1b	CR/PR	CTLA-4	Ipilimumab	HiSeq 2500(Illumina)
273	pt199	10.1126/science.aad0095	24.1333	Deceased	48	Male	M1c	SD	CTLA-4	Ipilimumab	HiSeq 2500(Illumina)
274	pt200	10.1126/science.aad0095	20.9333	Deceased	54	Female	M1a	PD	CTLA-4	Ipilimumab	HiSeq 2500(Illumina)
275	pt201	10.1126/science.aad0095	3.46667	Deceased	54	Female	M1c	PD	CTLA-4	Ipilimumab	HiSeq 2500(Illumina)
276	pt202	10.1126/science.aad0095	34.2333	Alive	22	Male	M1c	PD	CTLA-4	Ipilimumab	HiSeq 2500(Illumina)
277	pt203	10.1126/science.aad0095	15.2667	Deceased	83	Male	M1c	PD	CTLA-4	Ipilimumab	HiSeq 2500(Illumina)
278	pt204	10.1126/science.aad0095	9.76667	Deceased	55	Male	M1a	SD	CTLA-4	Ipilimumab	HiSeq 2500(Illumina)
279	pt205	10.1126/science.aad0095	32.9667	Alive	60	Female	M1c	SD	CTLA-4	Ipilimumab	HiSeq 2500(Illumina)
280	pt206	10.1126/science.aad0095	33.5	Alive	59	Male	M1c	CR/PR	CTLA-4	Ipilimumab	HiSeq 2500(Illumina)
281	pt207	10.1126/science.aad0095	4.1	Deceased	49	Male	M1c	PD	CTLA-4	Ipilimumab	HiSeq 2500(Illumina)
282	pt208	10.1126/science.aad0095	4.66667	Deceased	57	Female	M1c	PD	CTLA-4	Ipilimumab	HiSeq 2500(Illumina)
283	pt99	10.1126/science.aad0095	54.4	Alive	42	Female	M1c	SD	CTLA-4	Ipilimumab	HiSeq 2500(Illumina)
284	pt12A	10.1126/scitranslmed.aah3560	27.8333	Alive	70	Male	NA	PD	CTLA-4	Ipilimumab	HiSeq 2000/2500(Illumina)
285	pt15C	10.1126/scitranslmed.aah3560	15.5333	Deceased	43	Female	NA	PD	PD-1	Pembrolizumab	HiSeq 2000/2500(Illumina)
286	pt16C	10.1126/scitranslmed.aah3560	20.4333	Deceased	34	Male	NA	PD	CTLA-4 plus PD-1	Ipilimumab+Pembrolizumab	HiSeq 2000/2500(Illumina)
287	pt16D	10.1126/scitranslmed.aah3560	20.4333	Deceased	34	Male	NA	PD	CTLA-4 plus PD-1	Ipilimumab+Pembrolizumab	HiSeq 2000/2500(Illumina)
288	pt18A	10.1126/scitranslmed.aah3560	17.9667	Deceased	66	Female	NA	PD	CTLA-4 plus PD-1	Ipilimumab+Pembrolizumab	HiSeq 2000/2500(Illumina)
289	pt18C	10.1126/scitranslmed.aah3560	17.9667	Deceased	66	Female	NA	PD	CTLA-4 plus PD-1	Ipilimumab+Pembrolizumab	HiSeq 2000/2500(Illumina)
290	pt19D	10.1126/scitranslmed.aah3560	21.2	Deceased	55	Male	NA	PD	CTLA-4 plus PD-1	Ipilimumab+Pembrolizumab	HiSeq 2000/2500(Illumina)
291	pt1D	10.1126/scitranslmed.aah3560	18.0667	Deceased	48	Female	NA	PD	CTLA-4 plus PD-1	Ipilimumab+Pembrolizumab	HiSeq 2000/2500(Illumina)
292	pt20A	10.1126/scitranslmed.aah3560	26.1333	Alive	59	Male	NA	PD	CTLA-4 plus PD-1	Ipilimumab+Pembrolizumab	HiSeq 2000/2500(Illumina)
293	pt20E	10.1126/scitranslmed.aah3560	26.1333	Alive	59	Male	NA	PD	CTLA-4 plus PD-1	Ipilimumab+Pembrolizumab	HiSeq 2000/2500(Illumina)
294	pt21C	10.1126/scitranslmed.aah3560	8.23333	Deceased	63	Male	NA	PD	CTLA-4 plus PD-1	Ipilimumab+Pembrolizumab	HiSeq 2000/2500(Illumina)
295	pt22A	10.1126/scitranslmed.aah3560	20.7667	Alive	50	Female	NA	CR/PR	CTLA-4	Ipilimumab	HiSeq 2000/2500(Illumina)
296	pt22B	10.1126/scitranslmed.aah3560	20.7667	Alive	50	Female	NA	CR/PR	CTLA-4	Ipilimumab	HiSeq 2000/2500(Illumina)
297	pt23A	10.1126/scitranslmed.aah3560	22.3333	Alive	40	Male	NA	PD	CTLA-4 plus PD-1	Ipilimumab+Pembrolizumab	HiSeq 2000/2500(Illumina)
298	pt24C	10.1126/scitranslmed.aah3560	41.8	Alive	50	Male	NA	PD	CTLA-4 plus PD-1	Ipilimumab+Pembrolizumab	HiSeq 2000/2500(Illumina)
299	pt25A	10.1126/scitranslmed.aah3560	29.8	Deceased	46	Female	NA	PD	CTLA-4 plus PD-1	Ipilimumab+Pembrolizumab	HiSeq 2000/2500(Illumina)
300	pt25C	10.1126/scitranslmed.aah3560	29.8	Deceased	46	Female	NA	PD	CTLA-4 plus PD-1	Ipilimumab+Pembrolizumab	HiSeq 2000/2500(Illumina)
301	pt26C	10.1126/scitranslmed.aah3560	41.8667	Deceased	60	Female	NA	PD	CTLA-4 plus PD-1	Ipilimumab+Pembrolizumab	HiSeq 2000/2500(Illumina)
302	pt26E	10.1126/scitranslmed.aah3560	41.8667	Deceased	60	Female	NA	PD	CTLA-4 plus PD-1	Ipilimumab+Pembrolizumab	HiSeq 2000/2500(Illumina)
303	pt28A	10.1126/scitranslmed.aah3560	10.4667	Deceased	55	Male	NA	PD	CTLA-4 plus PD-1	Ipilimumab+Pembrolizumab	HiSeq 2000/2500(Illumina)
304	pt28D	10.1126/scitranslmed.aah3560	10.4667	Deceased	55	Male	NA	PD	CTLA-4 plus PD-1	Ipilimumab+Pembrolizumab	HiSeq 2000/2500(Illumina)
305	pt29C	10.1126/scitranslmed.aah3560	18.2667	Deceased	34	Male	NA	PD	CTLA-4 plus PD-1	Ipilimumab+Pembrolizumab	HiSeq 2000/2500(Illumina)
306	pt2E	10.1126/scitranslmed.aah3560	23.9667	Alive	50	Male	NA	PD	CTLA-4 plus PD-1	Ipilimumab+Pembrolizumab	HiSeq 2000/2500(Illumina)
307	pt31A	10.1126/scitranslmed.aah3560	59.6667	Alive	71	Female	NA	PD	CTLA-4	Ipilimumab	HiSeq 2000/2500(Illumina)
308	pt32A	10.1126/scitranslmed.aah3560	30.9	Alive	84	Female	NA	PD	CTLA-4 plus PD-1	Ipilimumab+Pembrolizumab	HiSeq 2000/2500(Illumina)
309	pt33A	10.1126/scitranslmed.aah3560	11.9667	Deceased	61	Female	NA	PD	CTLA-4 plus PD-1	Ipilimumab+Pembrolizumab	HiSeq 2000/2500(Illumina)
310	pt33C	10.1126/scitranslmed.aah3560	11.9667	Deceased	61	Female	NA	PD	CTLA-4 plus PD-1	Ipilimumab+Pembrolizumab	HiSeq 2000/2500(Illumina)
311	pt34A	10.1126/scitranslmed.aah3560	20.2667	Alive	69	Male	NA	CR/PR	CTLA-4 plus PD-1	Ipilimumab+Pembrolizumab	HiSeq 2000/2500(Illumina)
312	pt37B	10.1126/scitranslmed.aah3560	18.3667	Deceased	82	Male	NA	CR/PR	CTLA-4	Ipilimumab	HiSeq 2000/2500(Illumina)
313	pt3C	10.1126/scitranslmed.aah3560	14.9	Deceased	60	Female	NA	PD	CTLA-4 plus PD-1	Ipilimumab+Pembrolizumab	HiSeq 2000/2500(Illumina)
314	pt3D1	10.1126/scitranslmed.aah3560	14.9	Deceased	60	Female	NA	PD	CTLA-4 plus PD-1	Ipilimumab+Pembrolizumab	HiSeq 2000/2500(Illumina)
315	pt3D2	10.1126/scitranslmed.aah3560	14.9	Deceased	60	Female	NA	PD	CTLA-4 plus PD-1	Ipilimumab+Pembrolizumab	HiSeq 2000/2500(Illumina)
316	pt41A	10.1126/scitranslmed.aah3560	28.7	Alive	68	Male	NA	PD	CTLA-4 plus PD-1	Ipilimumab+Pembrolizumab	HiSeq 2000/2500(Illumina)
317	pt42E	10.1126/scitranslmed.aah3560	70.3667	Alive	48	Female	NA	PD	CTLA-4 plus PD-1	Ipilimumab+Pembrolizumab	HiSeq 2000/2500(Illumina)
318	pt45C	10.1126/scitranslmed.aah3560	44	Alive	59	Male	NA	PD	CTLA-4 plus PD-1	Ipilimumab+Pembrolizumab	HiSeq 2000/2500(Illumina)
319	pt45E	10.1126/scitranslmed.aah3560	44	Alive	59	Male	NA	PD	CTLA-4 plus PD-1	Ipilimumab+Pembrolizumab	HiSeq 2000/2500(Illumina)
320	pt47A	10.1126/scitranslmed.aah3560	36.4	Alive	72	Male	NA	CR/PR	CTLA-4 plus PD-1	Ipilimumab+Pembrolizumab	HiSeq 2000/2500(Illumina)
321	pt47D	10.1126/scitranslmed.aah3560	36.4	Alive	72	Male	NA	CR/PR	CTLA-4 plus PD-1	Ipilimumab+Pembrolizumab	HiSeq 2000/2500(Illumina)
322	pt49E	10.1126/scitranslmed.aah3560	36.4667	Deceased	46	Male	NA	PD	CTLA-4 plus PD-1	Ipilimumab+Pembrolizumab	HiSeq 2000/2500(Illumina)
323	pt4D	10.1126/scitranslmed.aah3560	36.1	Deceased	72	Male	NA	PD	CTLA-4 plus PD-1	Ipilimumab+Pembrolizumab	HiSeq 2000/2500(Illumina)
324	pt50A	10.1126/scitranslmed.aah3560	53.8667	Alive	68	Male	NA	PD	CTLA-4 plus PD-1	Ipilimumab+Pembrolizumab	HiSeq 2000/2500(Illumina)
325	pt50C	10.1126/scitranslmed.aah3560	53.8667	Alive	68	Male	NA	PD	CTLA-4 plus PD-1	Ipilimumab+Pembrolizumab	HiSeq 2000/2500(Illumina)
326	pt53A	10.1126/scitranslmed.aah3560	9.23333	Deceased	54	Male	NA	PD	CTLA-4 plus PD-1	Ipilimumab+Pembrolizumab	HiSeq 2000/2500(Illumina)
327	pt53D	10.1126/scitranslmed.aah3560	9.23333	Deceased	54	Male	NA	PD	CTLA-4 plus PD-1	Ipilimumab+Pembrolizumab	HiSeq 2000/2500(Illumina)
328	pt54A	10.1126/scitranslmed.aah3560	23.8	Alive	28	Male	NA	PD	CTLA-4 plus PD-1	Ipilimumab+Pembrolizumab	HiSeq 2000/2500(Illumina)
329	pt54C	10.1126/scitranslmed.aah3560	23.8	Alive	28	Male	NA	PD	CTLA-4 plus PD-1	Ipilimumab+Pembrolizumab	HiSeq 2000/2500(Illumina)
330	pt5A	10.1126/scitranslmed.aah3560	35.0667	Deceased	47	Female	NA	CR/PR	CTLA-4	Ipilimumab	HiSeq 2000/2500(Illumina)
331	pt6B	10.1126/scitranslmed.aah3560	28.0667	Deceased	48	Male	NA	PD	CTLA-4 plus PD-1	Ipilimumab+Pembrolizumab	HiSeq 2000/2500(Illumina)
332	pt7A	10.1126/scitranslmed.aah3560	39.1333	Alive	64	Male	NA	CR/PR	CTLA-4 plus PD-1	Ipilimumab+Pembrolizumab	HiSeq 2000/2500(Illumina)
333	pt7D	10.1126/scitranslmed.aah3560	39.1333	Alive	64	Male	NA	CR/PR	CTLA-4 plus PD-1	Ipilimumab+Pembrolizumab	HiSeq 2000/2500(Illumina)
334	pt9A	10.1126/scitranslmed.aah3560	40.4333	Alive	58	Male	NA	PD	CTLA-4 plus PD-1	Ipilimumab+Pembrolizumab	HiSeq 2000/2500(Illumina)
335	pt9C	10.1126/scitranslmed.aah3560	40.4333	Alive	58	Male	NA	PD	CTLA-4 plus PD-1	Ipilimumab+Pembrolizumab	HiSeq 2000/2500(Illumina)
336	pt9D	10.1126/scitranslmed.aah3560	40.4333	Alive	58	Male	NA	PD	CTLA-4 plus PD-1	Ipilimumab+Pembrolizumab	HiSeq 2000/2500(Illumina)
*CR: complete response; PR: partial response; SD: stable disease; PD: progressive disease
